# Supplementary material
Source: Springer Nature journal article supplement (https://www.springermedizin.de/resource/supplementary/12967_2011_731_MOESM8_ESM.pdf/9577388)

Up-regulated genes

| Study                       | Condition           | Up-regulated genes |
|-----------------------------|---------------------|--------------------|
| A HBV Study                 | T0, T1m             | 327                |
| B Melanoma Study            | T0, T42             | 196                |
| C PBMC <i>In vitro</i>      | PBMC CTR            | 278                |
| D Monocytes <i>In vitro</i> | CD14 CTR            | 252                |
|                             | Pre IFN $\alpha$    |                    |
|                             | T2, T1m+24h         | 327                |
|                             | T2, T44             | 196                |
|                             | PBMC + IFN $\alpha$ | 278                |
|                             | CD14+ IFN $\alpha$  | 252                |
|                             | Post IFN $\alpha$   |                    |

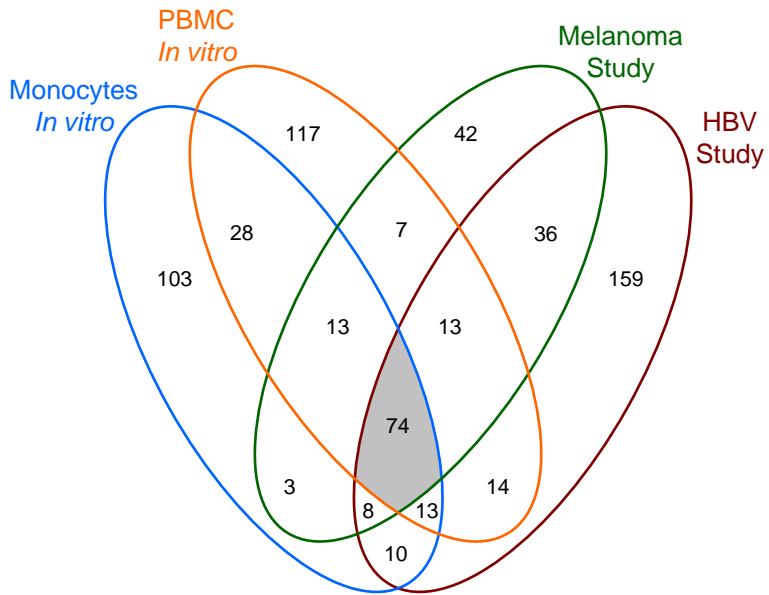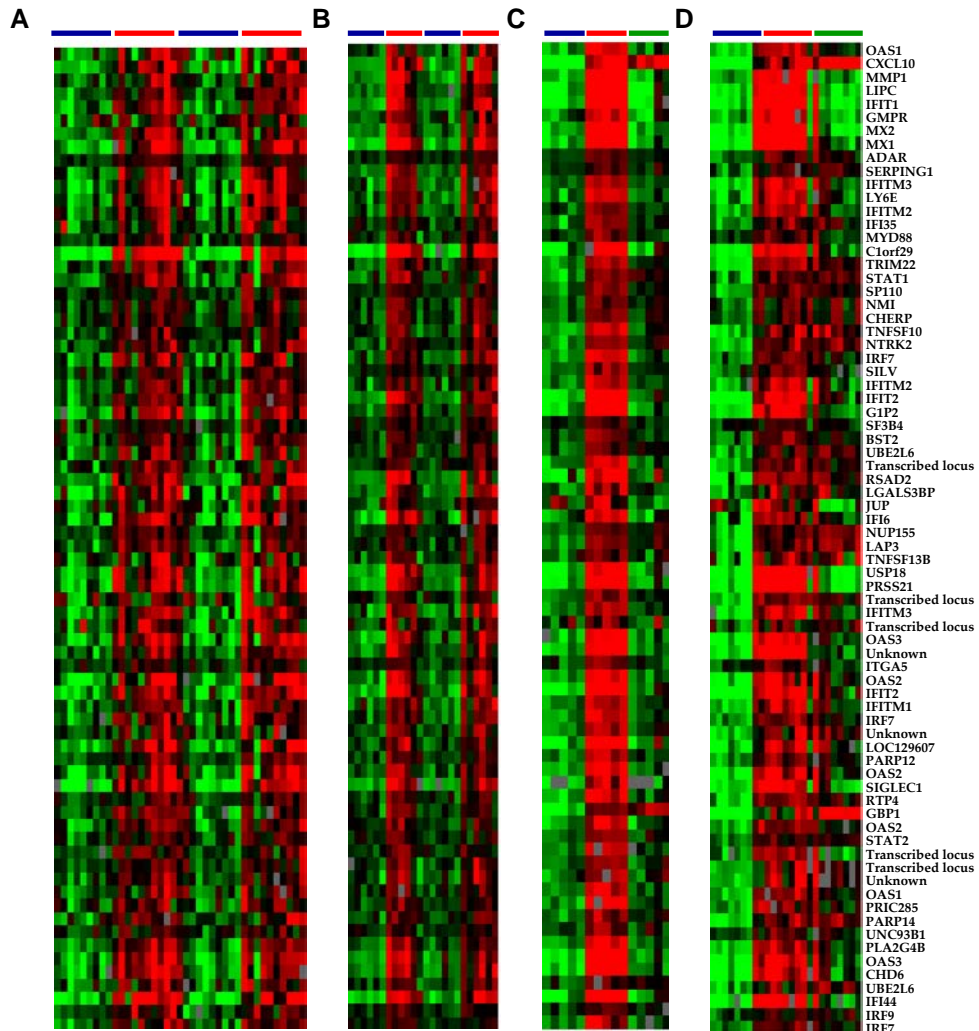

Supplement: MOESM8 [file 9577388]
